# Supplementary material for: Genome wide association neural networks (GWANN) identify genes linked to family history of Alzheimer’s disease
Source: bioRxiv or medRxiv preprint supplement (doi:10.1101/2022.06.10.22276251), 2024-05-07

**a**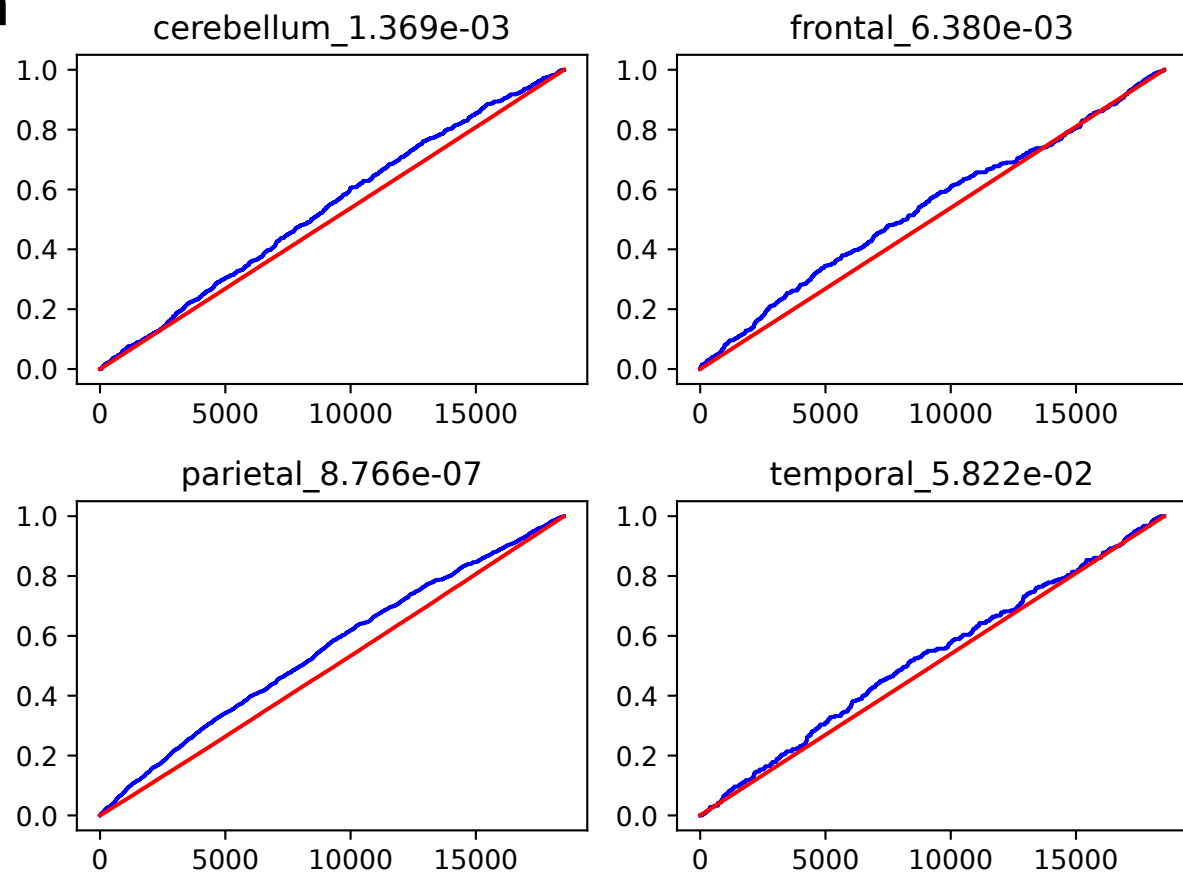**b**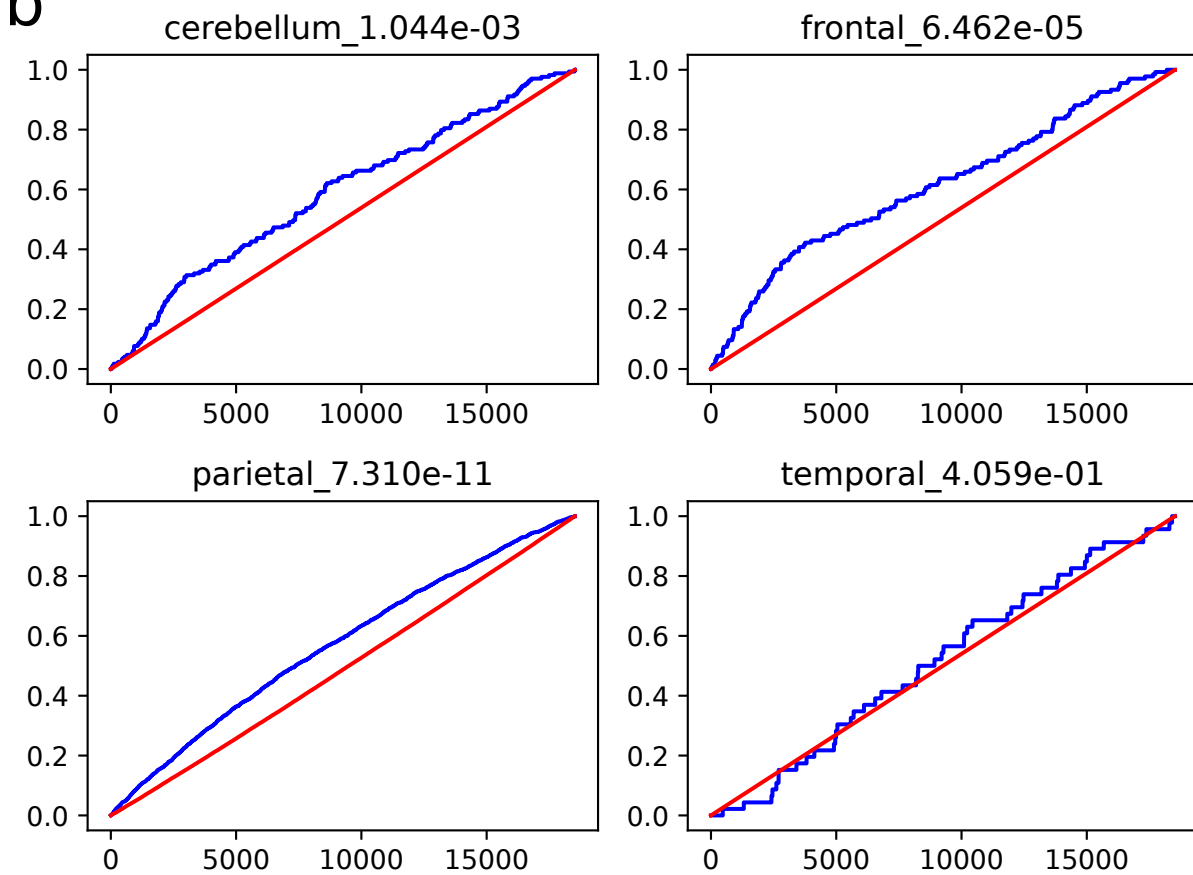**c**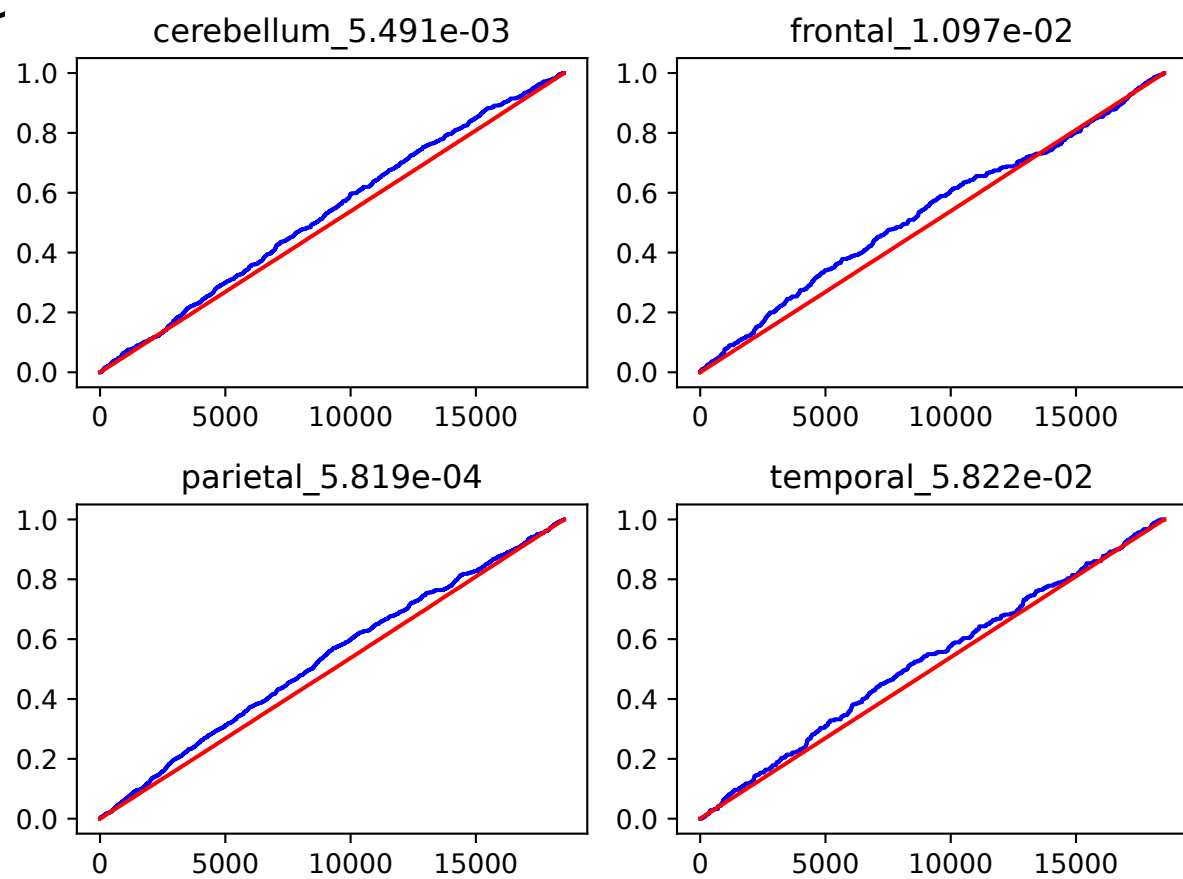**d**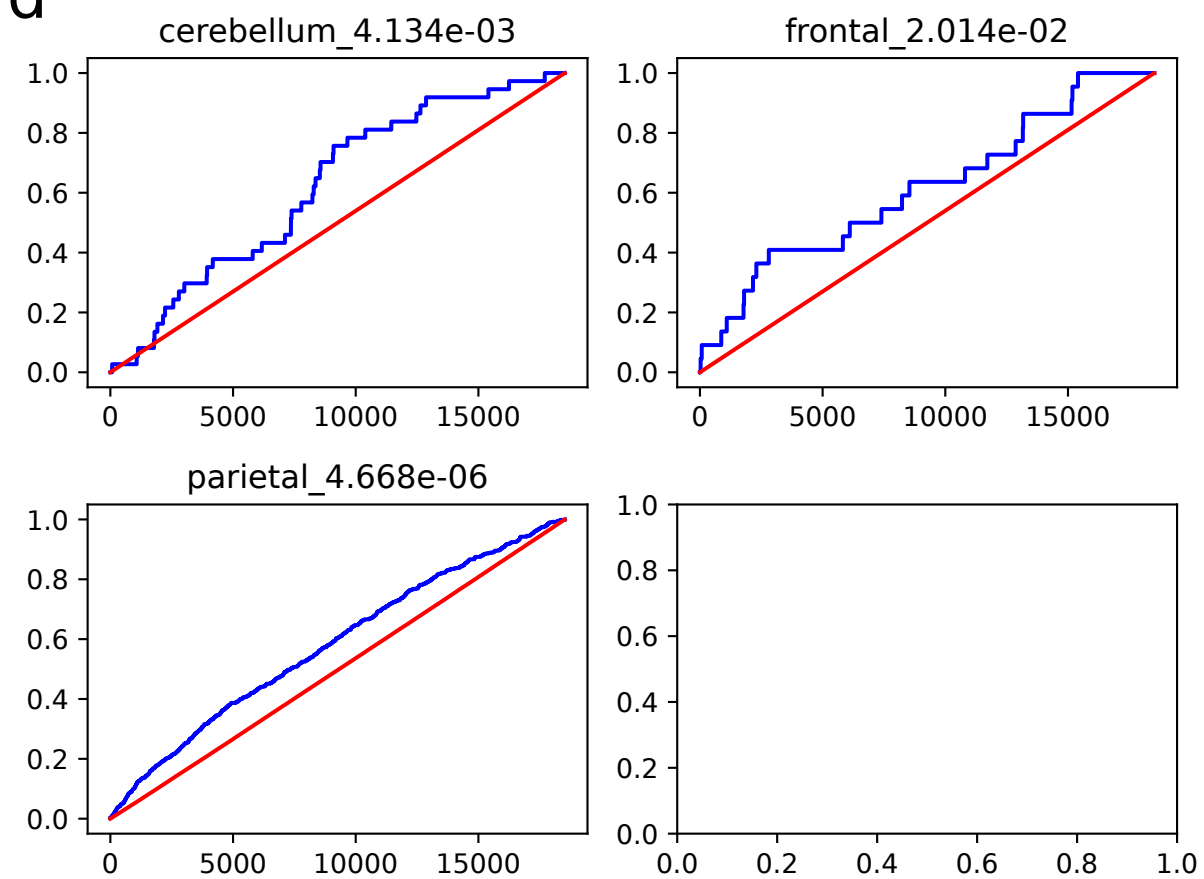

Supplement: Supplementary file [file media-3.pdf]
